# Supplementary material for: Validation of multiple single nucleotide variation calls by additional exome analysis with a semiconductor sequencer to supplement data of whole-genome sequencing of a human population
Source: PubMed Central journal article supplement (PMC4138778; doi:10.1186/1471-2164-15-673), 2014-08-10

Supplementary Figure 1

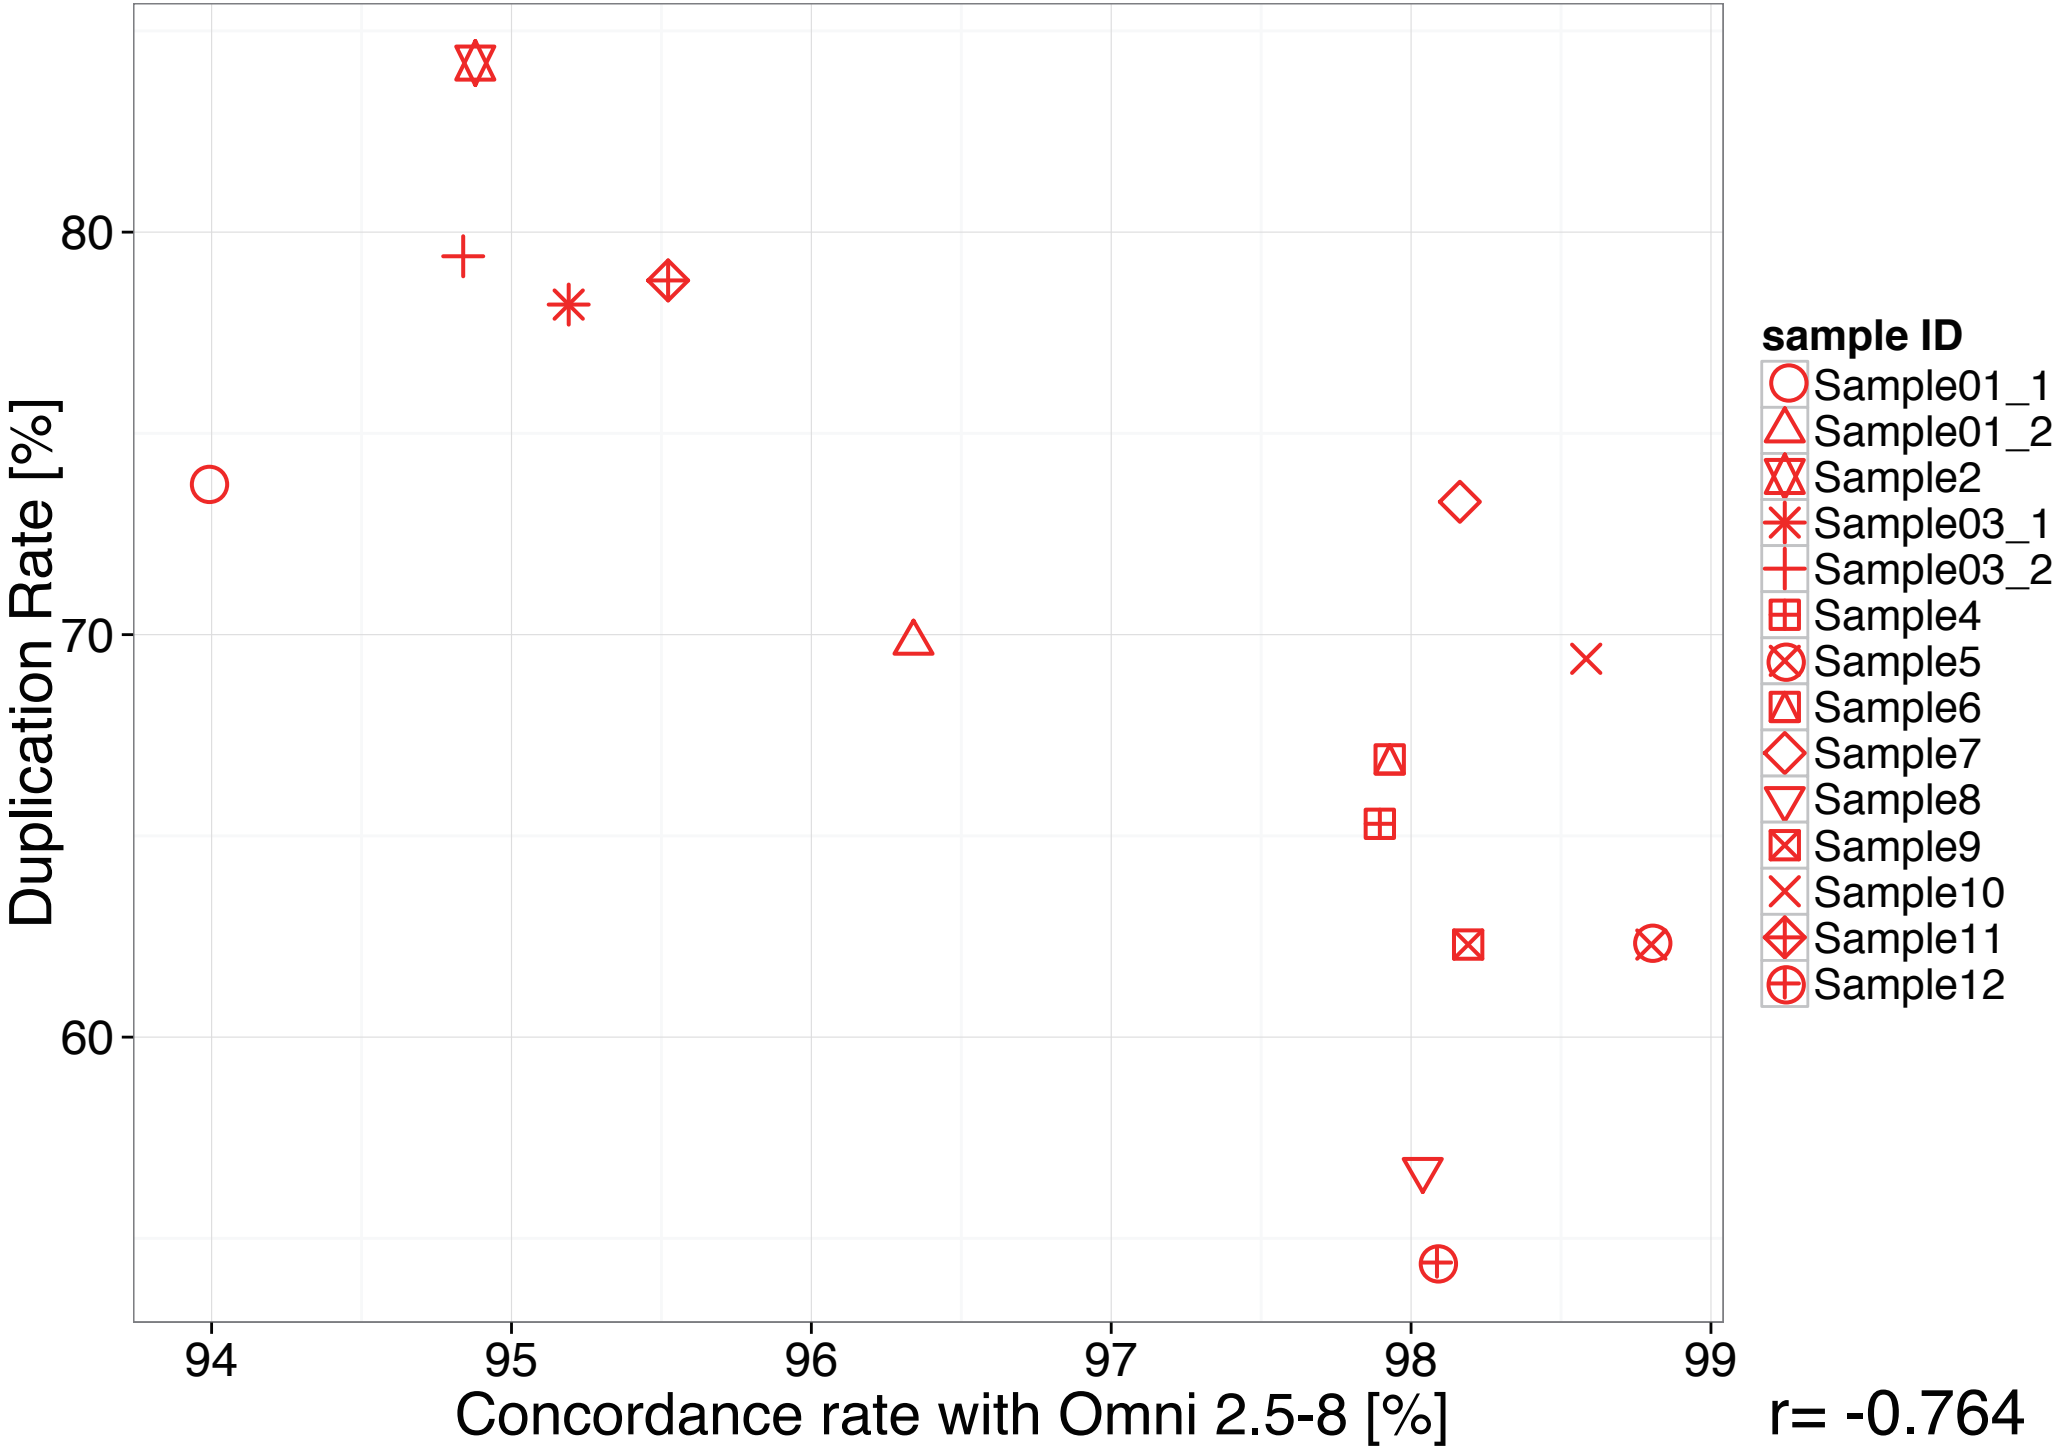

Supplement: 12864_2013_6358_MOESM2_ESM.pdf [file 12864_2013_6358_MOESM2_ESM.pdf]
